# Supplementary figures and images for: Argania Spinosa Fruit Shell Extract-Induced Melanogenesis via cAMP Signaling Pathway Activation
Source: MDPI journal article supplement (doi:10.3390/ijms21072539), 2020-04-06

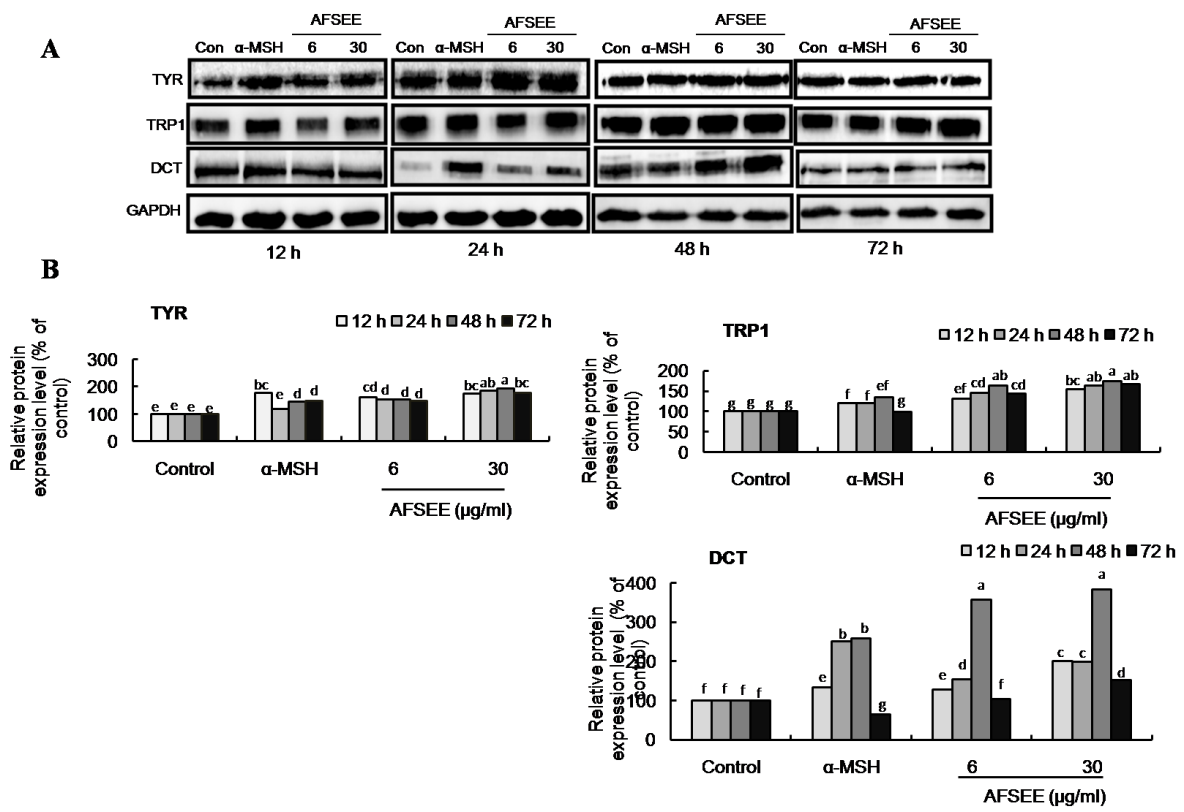

Supplement: s1 [file s1]

Supplementary Figure S-2

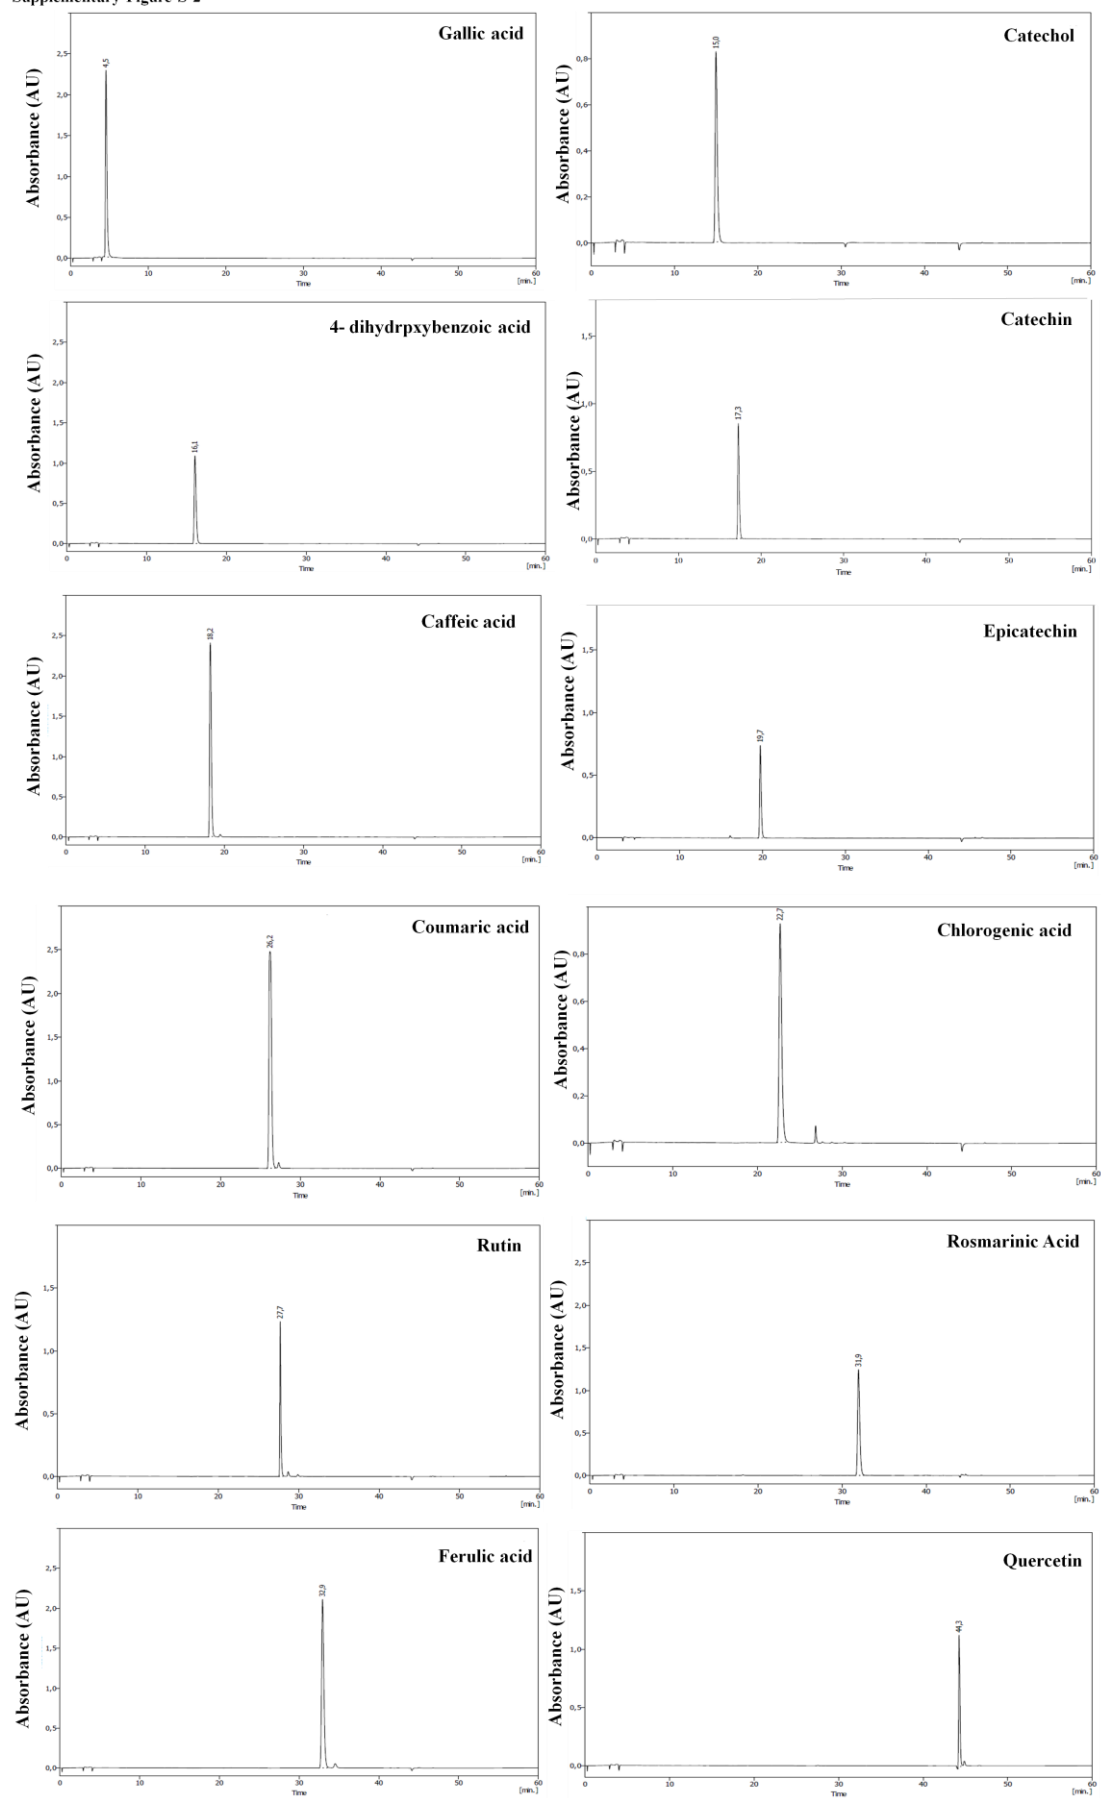

Supplement: s1 [file s1]
